# Supplementary material for: A Methodological Analysis of Randomized Clinical Trials of Computer-Assisted Therapies for Psychiatric Disorders: Toward Improved Standards for an Emerging Field
Source: Atypon-hosted journal article supplement (doi:10.1176/appi.ajp.2011.10101443), 2011-05-03
Supplement: ajp_168_08_790_01.pdf [file ajp_168_08_790_01.pdf]

Table. Agreement between raters using weighted kappa and absolute agreement

| Topic Area                  | General RCT quality (items 1-7) | CAT specific quality (items 8-14) | All items | % Agreement |
|-----------------------------|---------------------------------|-----------------------------------|-----------|-------------|
| Depression (17 trials)      | 0.54                            | 0.43                              | 0.48      | 78          |
| Anxiety (30 trials)         | 0.55                            | 0.55                              | 0.55      | 75          |
| Nicotine (15 trials)        | 0.45                            | 0.32                              | 0.38      | 78          |
| Alcohol/Drug Use (6 trials) | 0.40                            | 0.48                              | 0.44      | 75          |

Figure. Frequency of the number of criteria meeting standard

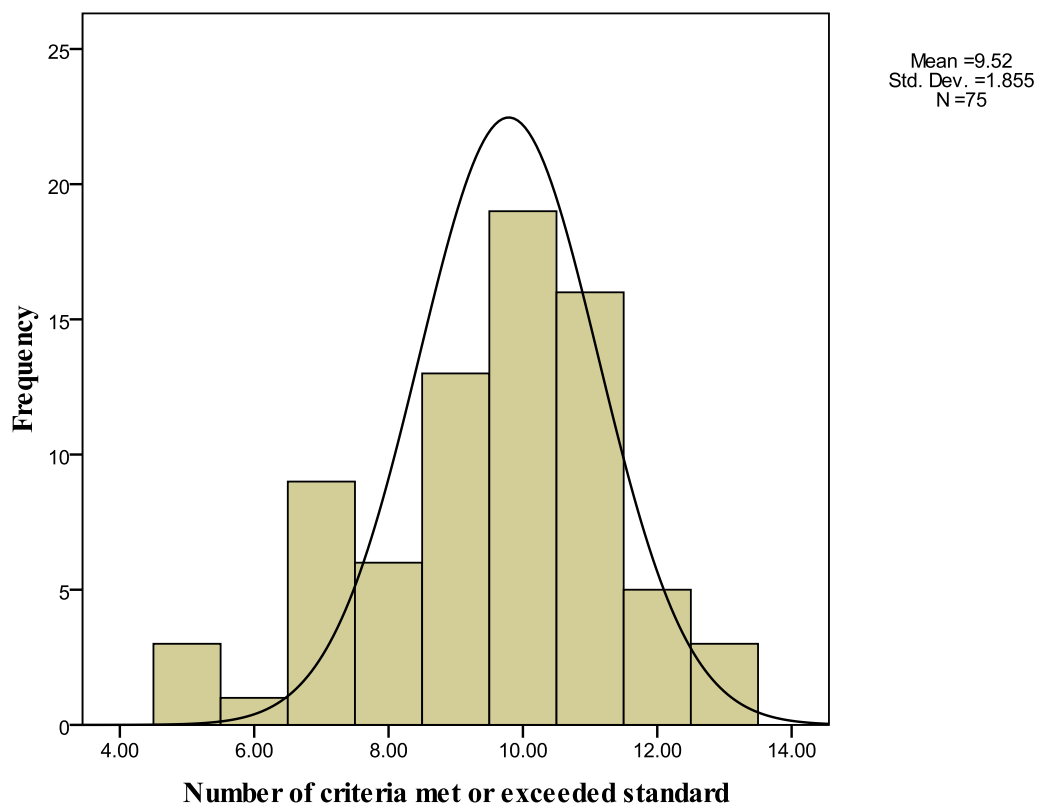

## Articles included in methodological quality rating

- An, L. C., Klatt, C., Perry, C. L., Lein, E. B., Hennrikus, D. J., Pallonen, U. E., et al. (2008). The RealU online cessation intervention for college smokers: A randomized controlled trial. *Preventive Medicine: An International Journal Devoted to Practice and Theory*, 47(2), 194-199.
- Andersson, G., Bergstrom, J., Hollandare, F., Carlbring, P., Kaldø, V., & Ekselius, L. (2005). Internet-based self-help for depression: Randomized controlled trial. *British Journal of Psychiatry*, 187, 456-461.
- Andersson, G., Carlbring, P., Holmström, A., Sparthán, E., Furmark, T., Nilsson-Ihrfelt, E., et al. (2006). Internet-based self-help with therapist feedback and in vivo group exposure for social phobia: A randomized controlled trial. *Journal of Consulting and Clinical Psychology*, 74(4), 677-686.
- Andersson, G., Waara, J., Jonsson, U., Malmæus, F., Carlbring, P., & Åst, L.-G. r. (2009). Internet-based self-help versus one-session exposure in the treatment of spider phobia: A randomized controlled trial. *Cognitive Behaviour Therapy*, 38(2), 114-120.
- Berger, T., Hohl, E. o., & Caspar, F. (2009). Internet-based treatment for social phobia: A randomized controlled trial. *Journal of Clinical Psychology*, 65(10), 1021-1035.
- Bickel, W. K., Marsch, L. A., Buchhalter, A. R., & Badger, G. J. (2008). Computerized behavior therapy for opioid-dependent outpatients: a randomized controlled trial. *Exp Clin Psychopharmacol*, 16(2), 132-143.
- Bowers, W., Scott, S., MacFarlane, R., & Gorman, L. (1993). Use of computer-administered cognitive-behavior therapy with depressed inpatients *Depression*, 1, 294-299.
- Brendryen, H., Drozd, F., & Kraft, P. (2008). A digital smoking cessation program delivered through internet and cell phone without nicotine replacement (happy ending): randomized controlled trial. *J Med Internet Res*, 10(5), e51.
- Brendryen, H. v., & Kraft, P. l. (2008). Happy Ending: A randomized controlled trial of a digital multi-media smoking cessation intervention. *Addiction*, 103(3), 478-484.
- Carlbring, P., Bohman, S., Brunt, S., Buhrman, M., Westling, B. E., Ekselius, L., et al. (2006). Remote treatment of panic disorder: A randomized trial of internet-based cognitive behavior therapy supplemented with telephone calls. *The American Journal of Psychiatry*, 163(12), 2119-2125.
- Carlbring, P., Ekselius, L., & Andersson, G. (2003). Treatment of panic disorder via the Internet: a randomized trial of CBT vs. applied relaxation. *Journal of Behavior Therapy and Experimental Psychiatry*, 34(2), 129-140.
- Carlbring, P., Gunnarsdóttir, M., Hedensjö, L., Andersson, G., Ekselius, L., & Furmark, T. (2007). Treatment of social phobia: Randomised trial of internet-delivered cognitive-behavioural therapy with telephone support. *British Journal of Psychiatry*, 190(2), 123-128.
- Carlbring, P., Nilsson-Ihrfelt, E., Waara, J., Kollenstam, C., Buhrman, M., Kaldø, V., et al. (2005). Treatment of panic disorder: Live therapy vs. self-help via the Internet. *Behavior Research and Therapy*, 43, 1321-1333.

- Carlbring, P., & Smit, F. (2008). Randomized trial of internet-delivered self-help with telephone support for pathological gamblers. *Journal of Consulting and Clinical Psychology, 76*(6), 1090-1094.
- Carlbring, P., Westling, B. E., Ljungstrand, P., Ekselius, L., & Andersson, G. (2001). Treatment of panic disorder via the Internet: A randomized trial of a self-help program. *Behavior Therapy, 32*(4), 751-764.
- Carroll, K. M., Ball, S. A., Martino, S., Nich, C., Babuscio, T. A., Nuro, K. F., et al. (2008). Computer-assisted delivery of cognitive-behavioral therapy for addiction: A randomized trial of CBT4CBT. [Empirical Study Quantitative Study]. *American Journal of Psychiatry, 165*(7), 881-888.
- Chiauzzi, E., Green, T. C., Lord, S., Thum, C., & Goldstein, M. (2005). My Student Body: A High-Risk Drinking Prevention Web Site for College Students. *Journal of American College Health, 53*(6), 263-274.
- Christensen, H., Griffiths, K. M., & Jorm, A. F. (2004). Delivering interventions for depression by using the internet: randomised controlled trial. *BMJ, 328*(7434), 265.
- Christensen, H., Griffiths, K. M., MacKinnon, A. J., & Brittliffe, K. (2006). Online randomized controlled trial of brief and full cognitive behavioral therapy for depression. *Psychological Medicine, 36*, 1737-1746.
- Clarke, G., Eubanks, D., Kelleher, C., O'Connor, E., DeBar, L. L., Lynch, F., et al. (2005). Overcoming Depression on the Internet (ODIN) (2): A Randomized Trial of a Self-Help Depression Skills Program With Reminders. *Journal of Medical Internet Research, 7*(2).
- Clarke, G., Kelleher, C., Hornbrook, M., DeBar, L., Dickerson, J., & Gullion, C. (2009). Randomized effectiveness trial of an internet, pure self-help, cognitive behavioral intervention for depressive symptoms in young adults. *Cognitive Behaviour Therapy, 38*(4), 222-234.
- Clarke, G., Reid, E., Eubanks, D., O'Connor, E., DeBar, L. L., Kelleher, C., et al. (2002). Overcoming depression on the internet (ODIN): A randomized controlled trial of an internet depression skills intervention program. *Journal of Medical Internet Research, 4*, e14.
- Dolezal-Wood, S., Belar, C. D., & Snibbe, J. (1998). A comparison of computer-assisted psychotherapy and cognitive-behavioral therapy in groups. *Journal of Clinical Psychology in Medical Settings, 5*(1), 103-115.
- Finfgeld-Connett, D., & Madsen, R. (2008). Web-based treatment of alcohol problems among rural women: Results of a randomized pilot investigation. *Journal of Psychosocial Nursing and Mental Health Services, 46*(9), 46-53.
- Fraser, J., Kirkby, K. C., Daniels, B., Gilroy, L., & Montgomery, I. M. (2001). Three versus six sessions of computer-aided vicarious exposure treatment for spider phobia. *Behaviour Change, 18*(4), 213-223.
- Furmark, T., Carlbring, P., Hedman, E., Sonnenstein, A., Clevberger, P., Bohman, B., et al. (2009). Guided and unguided self-help for social anxiety disorder: Randomised controlled trial. *British Journal of Psychiatry, 195*(5), 440-447.
- Gilroy, L. J., Kirkby, K. C., Daniels, B. A., Menzies, R. G., & Montgomery, I. M. (2000). Controlled comparison of computer-aided vicarious exposure versus live exposure in the treatment of spider phobia. *Behavior Therapy, 31*(4), 733-744.

- Grime, P. R. (2004). Computerized cognitive behavioural therapy at work: a randomized controlled trial in employees with recent stress-related absenteeism. *Occup Med (Lond)*, *54*(5), 353-359.
- Hazen, R. A., Vasey, M. W., & Schmidt, N. B. (2009). Attentional retraining: A randomized clinical trial for pathological worry. *Journal of Psychiatric Research*, *43*(6), 627-633.
- Hester, R. K., & Delaney, H. D. (1997). Behavioral self-control program for windows: Results of a controlled clinical trial. *Journal of Consulting and Clinical Psychology*, *65*, 686-693.
- Hester, R. K., Delaney, H. D., Campbell, W., & Handmaker, N. (2009). A web application for moderation training: initial results of a randomized clinical trial. *J Subst Abuse Treat*, *37*(3), 266-276.
- Hirai, M., & Clum, G. A. (2005). An Internet-based self-change program for traumatic event related fear, distress, and maladaptive coping. *J Trauma Stress*, *18*(6), 631-636.
- Jacobs, M. K., Christensen, A., Snibbe, J. R., Dolezal-Wood, S., Huber, A., & Polterok, A. (2001). A comparison of computer-based versus traditional individual psychotherapy. *Professional Psychology: Research and Practice*, *32*(1), 92-96.
- Japuntich, S. J., Zehner, M. E., Smith, S. S., Jorenby, D. E., Valdez, J. A., Fiore, M. C., et al. (2006). Smoking cessation via the internet: A randomized clinical trial of an internet intervention as adjuvant treatment in a smoking cessation intervention. *Nicotine and Tobacco Research*, *8*, S1, S59-S67.
- Kay-Lambkin, F. J., Baker, A. L., Lewin, T. J., & Carr, V. J. (2009). Computer based psychological treatment for comorbid depression and problematic alcohol and/or cannabis use: A randomized controlled trial of clinical efficacy. *Addiction*, *104*, 378-388.
- Kenardy, J. A., Dow, M. G. T., Johnston, D. W., Newman, M. G., Thomson, A., & Taylor, C. B. (2003). A comparison of delivery methods of cognitive-behavioral therapy for panic-disorder: An international multicenter trial. *Journal of Consulting and Clinical Psychology*, *71*(6), 1068-1075.
- Kiropoulos, L. A., Klein, B., Austin, D. W., Gilson, K., Pier, C., Mitchell, J., et al. (2008). Is internet-based CBT for panic disorder and agoraphobia as effective as face-to-face CBT? *Journal of Anxiety Disorders*, *22*, 1273-1284.
- Klein, B., & Richards, J. C. (2001). A brief Internet-based treatment for panic disorder. *Behavioural and Cognitive Psychotherapy*, *29*(1), 113-117.
- Klein, B., Richards, J. C., & Austin, D. W. (2006). Efficacy of internet therapy for panic disorder. *Journal of Behavior Therapy and Experimental Psychiatry*, *37*, 213-238.
- Knaevelsrud, C., & Maercker, A. (2007). Internet-based treatment for PTSD reduces distress and facilitates the development of a strong therapeutic alliance: a randomized controlled clinical trial. *BMC Psychiatry*, *7*, 13.
- Lange, A., Rietdijk, D., Hudcovicova, M., van de Ven, J. P., Schrieken, B., & Emmelkamp, P. M. (2003). Interapy: a controlled randomized trial of the standardized treatment of posttraumatic stress through the internet. *J Consult Clin Psychol*, *71*(5), 901-909.
- Lawrence, T., Aveyard, P., Evans, O., & Cheng, K. K. (2003). A cluster randomised controlled trial of smoking cessation in pregnant women comparing interventions

- based on the transtheoretical (stages of change) model to standard care. *Tob Control*, 12(2), 168-177.
- Marks, I. M., Kenwright, M., McDonough, M., Whittaker, M., & Mataix-Cols, D. (2004). Saving clinicians' time by delegating routine aspects of therapy to a computer: A randomized controlled trial in phobia/panic disorder. *Psychological Medicine: A Journal of Research in Psychiatry and the Allied Sciences*, 34(1), 9-17.
- McKay, H. G., Danaher, B. G., Seeley, J. R., Lichtenstein, E., & Gau, J. M. (2008). Comparing two web-based smoking cessation programs: randomized controlled trial. *J Med Internet Res*, 10(5), e40.
- Newman, M. G., Kenardy, J., Herman, S., & Taylor, C. B. (1997). Comparison of palmtop-computer-assisted brief cognitive-behavioral treatment to cognitive-behavioral treatment for panic disorder. *Journal of Consulting and Clinical Psychology*, 65(1), 178-183.
- O'Neill, H. K., Gillispie, M. A., & Slobin, K. (2000). Stages of change and smoking cessation: a computer-administered intervention program for young adults. *Am J Health Promot*, 15(2), 93-96, iii.
- Oenema, A., Brug, J., Dijkstra, A., de Weerd, I., & de Vries, H. (2008). Efficacy and use of an internet-delivered computer-tailored lifestyle intervention, targeting saturated fat intake, physical activity and smoking cessation: a randomized controlled trial. *Ann Behav Med*, 35(2), 125-135.
- Orbach, G., Lindsay, S., & Grey, S. (2007). A randomised placebo-controlled trial of a self-help Internet-based intervention for test anxiety. *Behav Res Ther*, 45(3), 483-496.
- Patten, C. A., Croghan, I. T., Meis, T. M., Decker, P. A., Pingree, S., Colligan, R. C., et al. (2006). Randomized clinical trial of an Internet-based versus brief office intervention for adolescent smoking cessation. *Patient Education and Counseling*, 64(1-3), 249-258.
- Proudfoot, J., Goldberg, D., Mann, A., Everitt, B., Marks, I., & Gray, J. A. (2003). Computerized, interactive, multimedia cognitive-behavioural program for anxiety and depression in general practice. *Psychological Medicine: A Journal of Research in Psychiatry and the Allied Sciences*, 33(2), 217-227.
- Proudfoot, J., Ryden, C., Everitt, B., Shapiro, D. A., Goldberg, D., Mann, A., et al. (2004). Clinical efficacy of computerised cognitive-behavioural therapy for anxiety and depression in primary care: randomised controlled trial. *Br J Psychiatry*, 185, 46-54.
- Rabius, V., Pike, K. J., Wiatrek, D., & McAlister, A. L. (2008). Comparing internet assistance for smoking cessation: 13-month follow-up of a six-arm randomized controlled trial. *J Med Internet Res*, 10(5), e45.
- Richards, J. C., Klein, B., & Austin, D. W. (2006). Internet cognitive behavioural therapy for panic disorder: Does the inclusion of stress management information improve end-state functioning? *Clinical Psychologist*, 10(1), 2-15.
- Riper, H., Kramer, J., Smit, F., Conijn, B., Schippers, G., & Cuijpers, P. (2008). Web-based self-help for problem drinkers: A pragmatic randomized trial. *Addiction*, 103(2), 218-227.

- Ritterband, L. M., Thorndike, F. P., Gonder-Frederick, L. A., Magee, J. C., Bailey, E. T., Saylor, D. K., et al. (2009). Efficacy of an Internet-based behavioral intervention for adults with insomnia. *Archives of General Psychiatry*, *66*(7), 692-698.
- Ruwaard, J., Schrieken, B., Schrijver, M., Broeksteeg, J., Dekker, J., Vermeulen, H., et al. (2009). Standardized web-based cognitive behavioural therapy of mild to moderate depression: A randomized controlled trial with a long-term follow-up. *Cognitive Behaviour Therapy*, *38*(4), 206-221.
- Schneider, A. J., Mataix-Cols, D., Marks, I. M., & Bachofen, M. (2005). Internet-Guided Self-Help with or without Exposure Therapy for Phobic and Panic Disorders. *Psychotherapy and Psychosomatics*, *74*(3), 154-164.
- Schneider, S. J., Walter, R., & O'Donnell, R. (1990). Computerized communication as a medium for behavioral smoking cessation treatment: Controlled evaluation. *Computers in Human Behavior*, *6*(2), 141-151.
- Selmi, P. M., Klein, M. H., Greist, J. H., Sorrell, S. P., & Erdman, H. P. (1990). Computer-administered CBT for depression. *American Journal of Psychiatry*, *147*, 51-56.
- Severson, H. H., Gordon, J. S., Danaher, B. G., & Akers, L. (2008). ChewFree.com: Evaluation of a web-based cessation program for smokeless tobacco users. *Nicotine & Tobacco Research*, *10*(2), 381-391.
- Shapiro, J. R., Reba-Harrelson, L., Dymek-Valentine, M., Woolson, S. L., Hamer, R. M., & Bulik, C. M. (2007). Feasibility and acceptability of CD-ROM-based cognitive-behavioural treatment for binge-eating disorder. *European Eating Disorders Review*, *15*(3), 175-184.
- Smith, K. L., Kirkby, K. C., Montgomery, I. M., & Daniels, B. A. (1997). Computer-delivered modeling of exposure for spider phobia: Relevant versus irrelevant exposure. *Journal of Anxiety Disorders*, *11*(5), 489-497.
- Spek, V., Cuijpers, P., Nyklicek, I., Riper, H., Keyzer, J., & Pop, V. (2007). Internet-based cognitive-behaviour therapy for symptoms of depression and anxiety: A meta-analysis. *Psychological Medicine*, *37*, 319-328.
- Spek, V., Nyklicek, I., Cuijpers, P., & Pop, V. (2008). Predictors of outcome of group and internet-based cognitive behavior therapy. *J Affect Disord*, *105*(1-3), 137-145.
- Ström, L., Pettersson, R., & Andersson, G. (2004). Internet-Based Treatment for Insomnia: A Controlled Evaluation. *Journal of Consulting and Clinical Psychology*, *72*(1), 113-120.
- Strecher, V. J., McClure, J. B., Alexander, G. L., Chakraborty, B., Nair, V. N., Konkell, J. M., et al. (2008). Web-based smoking-cessation programs: Results of a randomized trial. *American Journal of Preventive Medicine*, *34*(5), 373-381.
- Strecher, V. J., Shiffman, S., & West, R. (2005). Randomized controlled trial of a Web-based computer-tailored smoking cessation program as a supplement to nicotine patch therapy. *Addiction*, *100*, 682-688.
- Swartz, L. H. G., Noell, J. W., Schroeder, S. W., & Ary, D. V. (2006). A randomised controlled study of a fully automated internet based smoking cessation programme. *Tobacco Control*, *15*, 7-12.
- Tillfors, M., Carlbring, P., Furmark, T., Lewenhaupt, S., Spak, M., Eriksson, A., et al. (2008). Treating university students with social phobia and public speaking fears:

- Internet delivered self-help with or without live group exposure sessions. *Depression and Anxiety*, 25(8), 708-717.
- Titov, N., Andrews, G., Choi, I., Schwencke, G., & Mahoney, A. (2008). Shyness 3: randomized controlled trial of guided versus unguided Internet-based CBT for social phobia. *Aust N Z J Psychiatry*, 42(12), 1030-1040.
- Titov, N., Andrews, G., & Schwencke, G. (2008). Shyness 2: treating social phobia online: replication and extension. *Aust N Z J Psychiatry*, 42(7), 595-605.
- Titov, N., Andrews, G., Schwencke, G., Drobny, J., & Einstein, D. (2008). Shyness 1: distance treatment of social phobia over the Internet. *Aust N Z J Psychiatry*, 42(7), 585-594.
- van Straten, A., Cuijpers, P., & Smits, N. (2008). Effectiveness of a web-based self-help intervention for symptoms of depression, anxiety, and stress: Randomized controlled trial. *Journal of Medical Internet Research*, 10(1), 80-89.
- Warmerdam, L., van Straten, A., Twisk, J., Riper, H., & Cuijpers, P. (2008). Internet-based treatment for adults with depressive symptoms: randomized controlled trial. *J Med Internet Res*, 10(4), e44.
- Wright, J. H., Wright, A. S., Albano, A. M., Basco, M. R., Goldsmith, L. J., Raffield, T., et al. (2005). Computer-assisted cognitive therapy for depression: maintaining efficacy while reducing therapist time. *Am J Psychiatry*, 162(6), 1158-1164.
